# Supplementary material for: Evolutionary Analysis of Mitogenomes from Parasitic and Free-Living Flatworms
Source: PubMed Central journal article supplement (PMC4368550; doi:10.1371/journal.pone.0120081), 2015-03-20
Supplement: pone.0120081.s001.pdf [file pone.0120081.s001.pdf]

|             |      |      |      |      |      |      |      |      |            |      |         |      |      |      |       |      |      |      |       |      |       |      |      |      |       |      |   |      |      |      |      |     |       |       |       |      |
|-------------|------|------|------|------|------|------|------|------|------------|------|---------|------|------|------|-------|------|------|------|-------|------|-------|------|------|------|-------|------|---|------|------|------|------|-----|-------|-------|-------|------|
| Cestoda     | cox1 | T    | rrnL | C    | rrnS | cox2 | E    | nad6 | Y          | L    | S       | L    | R    | nad5 | G     | cox3 | H    | cob  | nad4l | nad4 | Q     | F    | M    | atp6 | nad2  | V    | A | D    | nad1 | N    | P    | I   | K     | nad3  | S     | W    |
| Monogenea 1 | cox1 | T    | rrnL | C    | rrnS | cox2 | E    | nad6 | Y          | L    | S       | L    | R    | nad5 | G     | cox3 | H    | cob  | nad4l | nad4 | F     | Q    | M    | atp6 | nad2  | V    | A | D    | nad1 | N    | P    | I   | K     | nad3  | S     | W    |
| Monogenea 2 | cox1 | T    | rrnL | C    | rrnS | cox2 | E    | nad6 | Y          | L    | Q       | M    | S    | L    | R     | nad5 | G    | cox3 | H     | cob  | nad4l | nad4 | F    | atp6 | nad2  | V    | A | D    | nad1 | N    | P    | I   | K     | nad3  | S     | W    |
| Monogenea 3 | cox1 | G    | T    | rrnL | rrnS | cox2 | H, M | cox3 | C, K, L, L | nad6 | R, S, Y | nad5 | E    | cob  | nad4l | nad4 | Q    | F    | atp6  | nad2 | V     | A    | D    | nad1 | N     | P    | I | K    | nad3 | S    | W    |     |       |       |       |      |
| Trematoda 1 | cox1 | T    | rrnL | C    | rrnS | cox2 | nad6 | Y    | L          | S    | L       | R    | nad5 | E    | G     | cox3 | H    | cob  | nad4l | nad4 | Q     | F    | M    | atp6 | nad2  | V    | A | D    | nad1 | N    | P    | I   | K     | nad3  | S     | W    |
| Trematoda 2 | cox1 | T    | rrnL | C    | rrnS | cox2 | nad6 | Y    | L          | S    | L       | R    | nad5 | G    | cox3  | E    | H    | cob  | nad4l | nad4 | Q     | F    | M    | atp6 | nad2  | A    | D | nad1 | N    | P    | I    | K   | nad3  | W     | V     | S    |
| Trematoda 3 | cox1 | T    | rrnL | C    | rrnS | cox2 | nad6 | Y    | L          | S    | N       | I    | F    | atp6 | nad2  | A    | L    | R    | nad5  | G    | cox3  | E    | H    | cob  | nad4l | nad4 | Q | K    | nad3 | D    | nad1 | V   | P     | M     | W     | S    |
| Microstomum | cox1 | atp6 | L    | F    | K    | cox3 | K    | rrnL | S          | rrnS | Q       | A    | nad5 | cob  |       |      |      |      |       |      |       |      |      |      |       |      |   |      |      |      |      |     |       |       |       |      |
| Dugesia     | cox1 | nad6 | nad5 | S    | D    | R    | cox3 | I    | Q          | K    | atp6    | V    | nad1 | W    | cox2  | P    | nad3 | A    | nad2  | E    | N     | M    | H    | F    | rrnS  | L    | Y | G    | S    | rrnL | L    | T   | C     | cob   | nad4l | nad4 |
| Schmidtea   | cox1 | E    | nad6 | nad5 | S    | D    | R    | cox3 | I          | Q    | K       | atp6 | V    | nad1 | W     | cox2 | P    | nad3 | A     | nad2 | M     | H    | F    | rrnS | L     | Y    | G | rrnL | L    | T    | C    | N   | cob   | nad4l | nad4  | F    |
| Obama       | cox1 | E    | nad6 | nad5 | S    | D    | R    | cox3 | I          | Q    | K       | atp6 | V    | nad1 | W     | cox2 | P    | nad3 | A     | nad2 | M     | H    | C    | rrnS | L     | Y    | G | S    | rrnL | T    | L    | N   | cob   | nad4l | nad4  | F    |
| Crenobia    | cox1 | E    | nad6 | nad5 | S    | D    | R    | cox3 | I          | Q    | K       | atp6 | V    | nad1 | W     | cox2 | P    | nad3 | A     | nad2 | F     | C    | rrnS | L    | Y     | G    | S | rrnL | L    | T    | N    | cob | nad4l | nad4  | M     | H    |
