# Supplementary material for: Evolutionary Analysis of Mitogenomes from Parasitic and Free-Living Flatworms
Source: PubMed Central journal article supplement (PMC4368550; doi:10.1371/journal.pone.0120081), 2015-03-20

A)

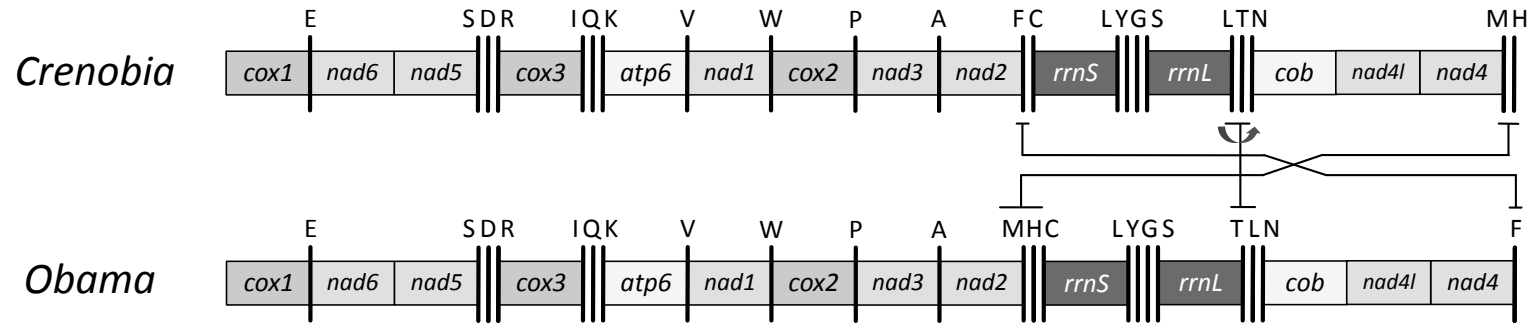

B)

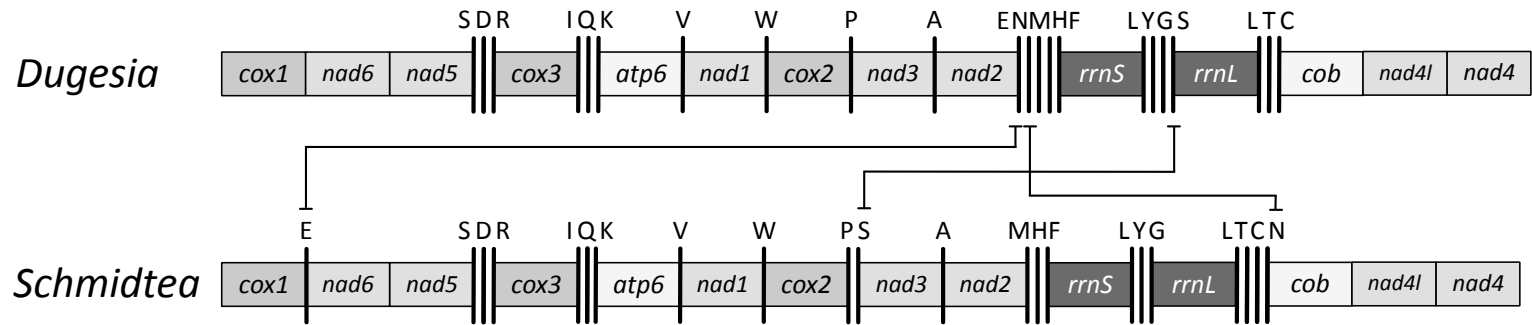

C)

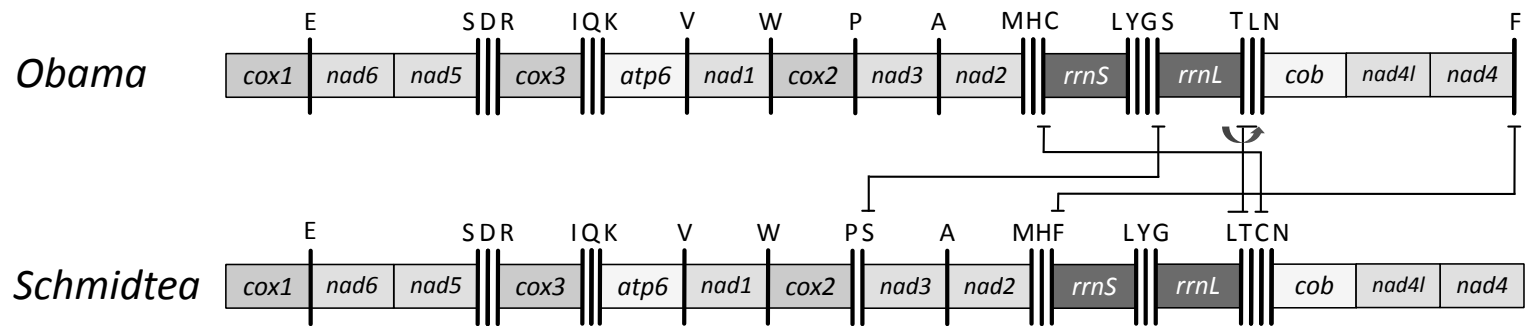

Supplement: pone.0120081.s004.pdf [file pone.0120081.s004.pdf]
